# Supplementary material
Source: bioRxiv or medRxiv preprint supplement (https://www.biorxiv.org/highwire/filestream/32503/field_highwire_adjunct_files/0/112565-1.pdf)
Supplement: Supplementary file [file 112565-1.pdf]

# Supplementary Materials for GMPR: A novel normalization method for microbiome sequencing data

## Supplementary Note

The details of how to estimate the size factors using each normalization method are described as follows.

- GMPR (Geometric Mean of Pairwise Ratios): The size factors for all samples are calculated by GMPR described in the main text.
- CSS (Cumulative Sum Scaling): The size factors for all samples are calculated by applying `newMRExperiment`, `cumNorm` and `normFactors` in Bioconductor package `metagenomeSeq`. Normalized read counts are obtained by dividing the raw read counts by the size factors.
- RLE (Relative Log Expression): The size factors for all samples are calculated by the `calcNormFactors` with the parameter set as “RLE” in the edgeR Bioconductor package. The scaled size factors are obtained by multiplying the size factors with the total read count. Normalized read counts are obtained by dividing the raw read counts by the scaled size factors.
- RLE+ (Relative Log Expression plus pseudo-counts): The scaled size factors for all samples are calculated in the same way as RLE, except that each data entry is added with a pseudo-count 1. Normalized read counts are obtained by dividing the raw read counts by the scaled size factors.
- TMM (Trimmed Mean of M values): The size factors for all samples are calculated by the `calcNormFactors` function with the parameter set as “TMM” in the edgeR Bioconductor package. The scaled size factors are obtained by multiplying the size factors with the total read count. Normalized read counts are obtained by dividing the raw read counts by the scaled size factors.
- TMM+ (Trimmed Mean of M values plus pseudo-counts): The scaled size factors for all sample are calculated in the same way as TMM, except that each data entry is added with a pseudo-count 1. Normalized read counts are obtained by dividing the raw read counts by the scaled size factors.
- TSS (Total Sum Scaling): The size factors are taken to be the total read counts. Normalized read counts are obtained by dividing the raw read counts by the size factors.

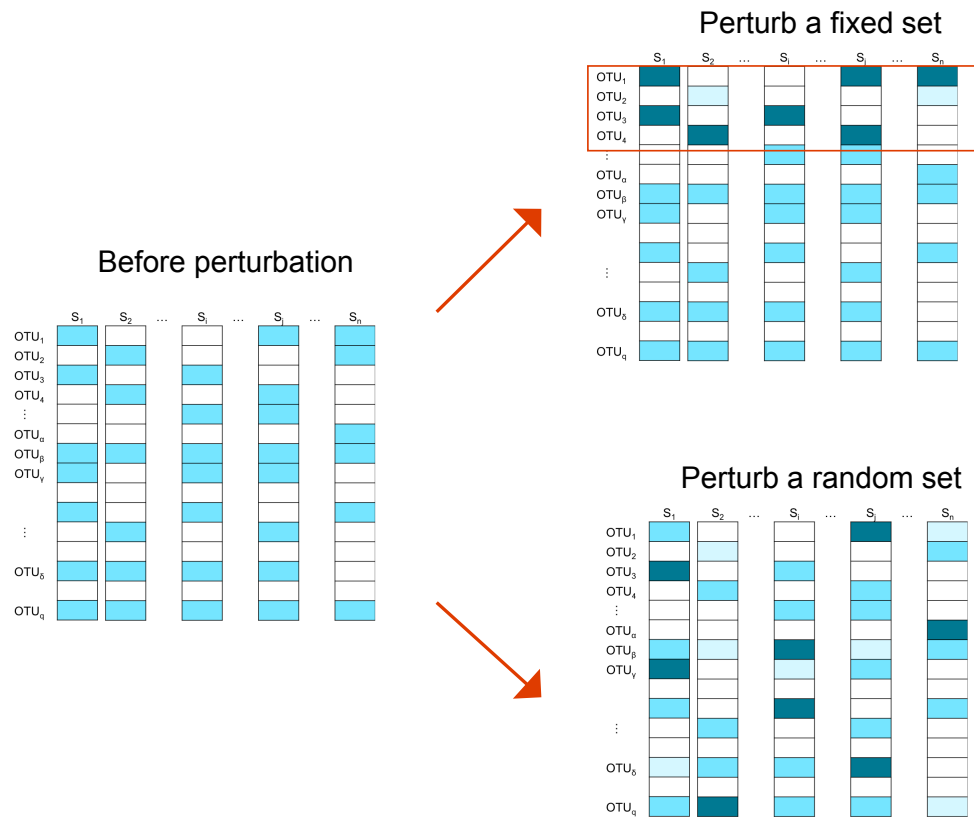

Figure S1: Illustration of the simulation strategy. In the ‘fixed’ perturbation approach, the same set of OTUs are decreased/increased in the same direction for all samples, reflecting differentially abundant OTUs under certain conditions such as disease state. In the ‘random’ perturbation approach, each sample has a random set of OTUs perturbed with a random direction, reflecting the sample-specific outliers. The darkness of the color indicates the OTU abundance.

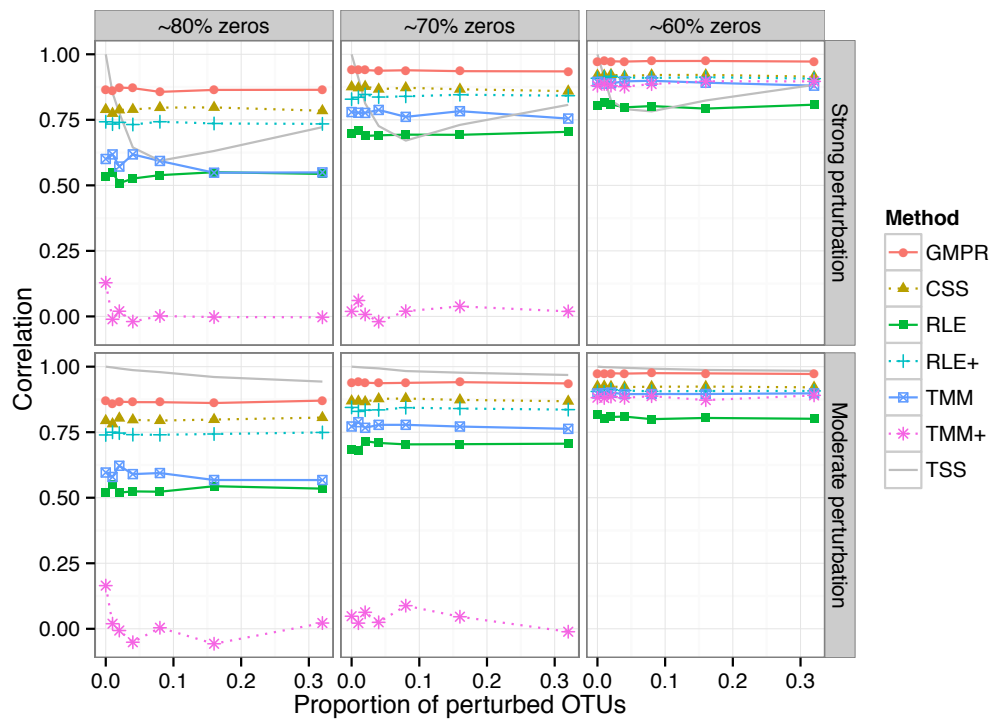

Figure S2: Spearman's correlation between the estimated size factors and the simulated 'true' library sizes when a fixed set of OTUs are perturbed. The performance of different normalization methods are compared under different level of zero inflation, percentage of perturbed OTUs and strength of perturbation.

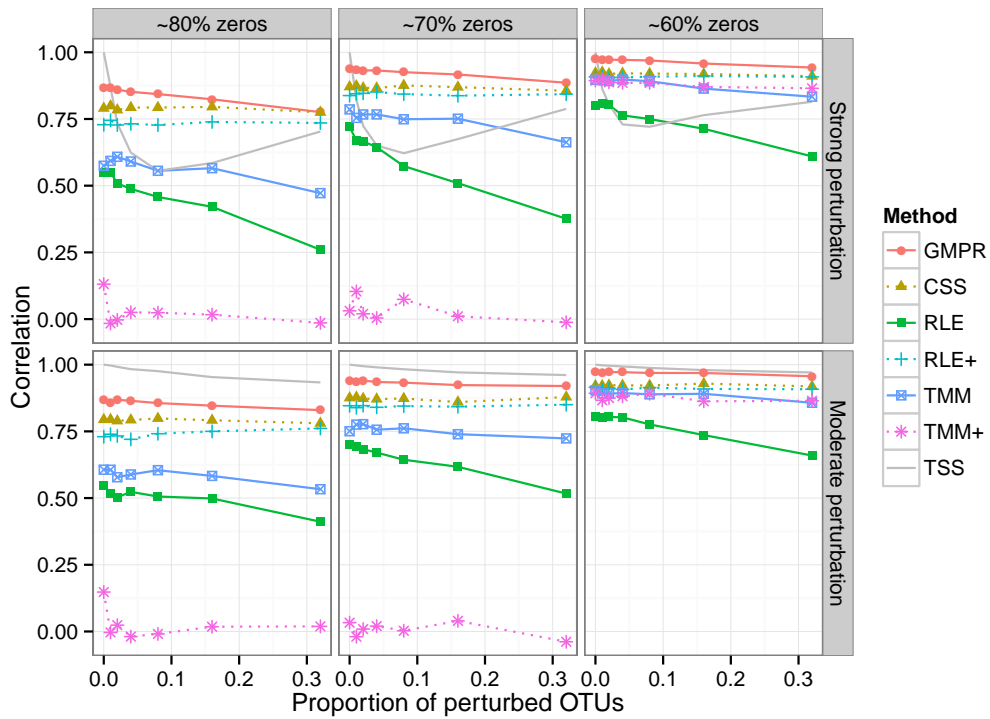

Figure S3: Spearman's correlation between the estimated size factors and the simulated 'true' library sizes when a random set of OTUs are perturbed. The performance of different normalization methods are compared under different level of zero inflation, percentage of perturbed OTUs and strength of perturbation.

Table S1: 38 gut microbiome datasets (stool samples) from qiita ( $n \geq 50$ )

|    | study.object                                     | study.ID | sample.size |
|----|--------------------------------------------------|----------|-------------|
| 1  | infant gut fecal samples                         | 101      | 63          |
| 2  | infant fecal samples                             | 10293    | 144         |
| 3  | human and canine fecal samples                   | 10394    | 1535        |
| 4  | mice fecal sample                                | 10469    | 391         |
| 5  | human fecal samples                              | 1561     | 52          |
| 6  | human(HIV) fecal samples                         | 1700     | 58          |
| 7  | Cape Buffalo fecal samples                       | 1736     | 642         |
| 8  | Skin, oral and fecal samples                     | 1841     | 3735        |
| 9  | stool New-Onset Crohns Disease                   | 1998     | 284         |
| 10 | TwinsUK population fecal samples                 | 2014     | 1081        |
| 11 | Saliva, skin and fecal samples from ICU patients | 2136     | 554         |
| 12 | human fecal samples                              | 455      | 92          |
| 13 | human fecal samples                              | 457      | 91          |
| 14 | mice fecal microbiota                            | 654      | 212         |
| 15 | pregnant women fecal samples                     | 867      | 1007        |
| 16 | human infant gut                                 | 10297    | 85          |
| 17 | monkey gut                                       | 10315    | 199         |
| 18 | Grant gazelle gut                                | 10323    | 768         |
| 19 | human gut western Oklahoma                       | 10342    | 58          |
| 20 | human gastrointestinal gut                       | 1070     | 118         |
| 21 | human gut                                        | 1189     | 436         |
| 22 | zebrafish gut                                    | 1192     | 50          |
| 23 | Asian primates gut                               | 1453     | 318         |
| 24 | cow hindgut                                      | 1621     | 192         |
| 25 | mice gut                                         | 1634     | 294         |
| 26 | monkey gut                                       | 1696     | 172         |
| 27 | bat gut                                          | 1734     | 96          |
| 28 | colobine primates gut                            | 2182     | 167         |
| 29 | human gut and salivary                           | 2202     | 820         |
| 30 | bat gut                                          | 2338     | 192         |
| 31 | human gut and mouth, and skin                    | 449      | 602         |
| 32 | humann gut microbiome (mouse samples)            | 452      | 160         |
| 33 | humann gut microbiome (mouse samples)            | 456      | 158         |
| 34 | human gastrointestinal                           | 492      | 77          |
| 35 | human gut (obese and lean twins)                 | 77       | 281         |
| 36 | human gut                                        | 850      | 528         |
| 37 | freshwater fish slime and gut                    | 940      | 288         |
| 38 | Iguanas gut                                      | 963      | 100         |

Table S2: The frequency of 1st rank in the 38 real stool microbiome data sets.

|              | GMPR | CSS | RLE | RLE+ | TMM | TMM+ | TSS | RAW |
|--------------|------|-----|-----|------|-----|------|-----|-----|
| OTU(All)     | 22   | 7   | 0   | 0    | 0   | 0    | 8   | 1   |
| OTUs(Top)    | 23   | 3   | 1   | 1    | 3   | 0    | 7   | 0   |
| OTUs(Middle) | 20   | 8   | 0   | 0    | 1   | 0    | 9   | 0   |
| OTUs(Bottom) | 20   | 8   | 0   | 0    | 2   | 2    | 6   | 0   |
